# Supplementary material for: Disability Weights Measurement for 228 Causes of Disease in the Korean Burden of Disease Study 2012
Source: PubMed Central journal article supplement — J Korean Med Sci. 2016 Jun 13;31(Suppl 2):S129–38. doi: 10.3346/jkms.2016.31.S2.S129 (PMC5081294; doi:10.3346/jkms.2016.31.s2.s129), 2016-06-13
Supplement: jkms-31-S129-s002.pdf [file jkms-31-S129-s002.pdf]

**Supplementary Table 2.** Comparison of disability weights for causes of disease between this study and a previous study

| Cause of disease                                                           | Disability weight |                     | Difference |
|----------------------------------------------------------------------------|-------------------|---------------------|------------|
|                                                                            | From this study   | From previous study |            |
| Schizophrenia                                                              | 0.885             | 0.882               | 0.003      |
| Influenza                                                                  | 0.131             | 0.135               | -0.004     |
| Iodine deficiency                                                          | 0.166             | 0.172               | -0.006     |
| Poisonings                                                                 | 0.546             | 0.540               | 0.006      |
| Leukemia                                                                   | 0.845             | 0.836               | 0.009      |
| Brain and nervous system cancers                                           | 0.874             | 0.865               | 0.009      |
| Cleft lip and cleft palate                                                 | 0.424             | 0.414               | 0.010      |
| Diphtheria                                                                 | 0.389             | 0.378               | 0.011      |
| Esophageal cancer                                                          | 0.875             | 0.863               | 0.012      |
| Ischemic stroke                                                            | 0.809             | 0.796               | 0.013      |
| Bone and connective tissue cancer                                          | 0.816             | 0.800               | 0.016      |
| Cervical cancer                                                            | 0.744             | 0.727               | 0.017      |
| Drowning                                                                   | 0.660             | 0.677               | -0.017     |
| Acute glomerulonephritis                                                   | 0.445             | 0.424               | 0.021      |
| Attention-deficit hyperactivity disorder                                   | 0.379             | 0.356               | 0.023      |
| Osteoarthritis                                                             | 0.370             | 0.346               | 0.024      |
| Borderline personality disorder                                            | 0.603             | 0.577               | 0.026      |
| Neural tube defects                                                        | 0.897             | 0.927               | -0.030     |
| Benign prostatic hyperplasia                                               | 0.289             | 0.257               | 0.032      |
| Congenital heart anomalies                                                 | 0.686             | 0.721               | -0.035     |
| Upper respiratory infections                                               | 0.088             | 0.052               | 0.036      |
| Otitis media                                                               | 0.138             | 0.175               | -0.037     |
| Gallbladder and biliary tract cancer                                       | 0.827             | 0.865               | -0.038     |
| Bladder cancer                                                             | 0.792             | 0.831               | -0.039     |
| Ovarian cancer                                                             | 0.791             | 0.831               | -0.040     |
| Down's syndrome                                                            | 0.908             | 0.866               | 0.042      |
| Fire, heat, and hot substances                                             | 0.545             | 0.588               | -0.043     |
| Pancreatic cancer                                                          | 0.938             | 0.892               | 0.046      |
| Bipolar affective disorder                                                 | 0.610             | 0.660               | -0.050     |
| Rheumatoid arthritis                                                       | 0.549             | 0.497               | 0.052      |
| Mumps                                                                      | 0.193             | 0.140               | 0.053      |
| Trachea, bronchus, and lung cancers                                        | 0.917             | 0.864               | 0.053      |
| Major depressive disorder                                                  | 0.606             | 0.660               | -0.054     |
| Alcohol use disorders                                                      | 0.436             | 0.382               | 0.054      |
| Alzheimer's disease and other dementias                                    | 0.854             | 0.911               | -0.057     |
| Tubulointerstitial nephritis, pyelonephritis, and urinary tract infections | 0.483             | 0.424               | 0.059      |
| Kidney cancer                                                              | 0.777             | 0.839               | -0.062     |
| Appendicitis                                                               | 0.133             | 0.195               | -0.062     |
| Multiple sclerosis                                                         | 0.778             | 0.716               | 0.062      |
| Ischemic heart disease                                                     | 0.790             | 0.727               | 0.063      |
| Obsessive-compulsive disorder                                              | 0.391             | 0.457               | -0.066     |
| Uterine cancer                                                             | 0.745             | 0.812               | -0.067     |
| Rheumatic heart disease                                                    | 0.685             | 0.616               | 0.069      |
| Periodontal disease                                                        | 0.209             | 0.138               | 0.071      |
| Post-traumatic stress disorder                                             | 0.435             | 0.362               | 0.073      |
| Protein-energy malnutrition                                                | 0.362             | 0.287               | 0.075      |
| Iron-deficiency anemia                                                     | 0.122             | 0.037               | 0.085      |
| Maternal hemorrhage                                                        | 0.514             | 0.425               | 0.089      |
| Prostate cancer                                                            | 0.701             | 0.791               | -0.090     |
| Parkinson's disease                                                        | 0.780             | 0.690               | 0.090      |
| Cataracts                                                                  | 0.384             | 0.293               | 0.091      |
| Dental caries                                                              | 0.137             | 0.044               | 0.093      |
| Panic disorder                                                             | 0.526             | 0.433               | 0.093      |
| Whooping cough                                                             | 0.256             | 0.157               | 0.099      |
| Colon and rectum cancers                                                   | 0.759             | 0.863               | -0.104     |
| Varicella                                                                  | 0.223             | 0.117               | 0.106      |

(Continued to the next page)

Supplementary Table 2. Continued

| Cause of disease                                                   | Disability weight |                     | Difference |
|--------------------------------------------------------------------|-------------------|---------------------|------------|
|                                                                    | From this study   | From previous study |            |
| Obstructed labor                                                   | 0.471             | 0.363               | 0.108      |
| Breast cancer                                                      | 0.704             | 0.819               | -0.115     |
| Hypertensive disorders of pregnancy                                | 0.508             | 0.389               | 0.119      |
| Stomach cancer                                                     | 0.724             | 0.847               | -0.123     |
| Schistosomiasis                                                    | 0.340             | 0.215               | 0.125      |
| Ascariasis                                                         | 0.256             | 0.122               | 0.134      |
| Asthma                                                             | 0.367             | 0.504               | -0.137     |
| Tuberculosis                                                       | 0.464             | 0.325               | 0.139      |
| Vitamin A deficiency                                               | 0.223             | 0.079               | 0.144      |
| Measles                                                            | 0.279             | 0.123               | 0.156      |
| Low back pain                                                      | 0.315             | 0.154               | 0.161      |
| Idiopathic intellectual disability                                 | 0.676             | 0.838               | -0.162     |
| Trichuriasis                                                       | 0.320             | 0.157               | 0.163      |
| Tetanus                                                            | 0.524             | 0.354               | 0.170      |
| Onchocerciasis                                                     | 0.357             | 0.179               | 0.178      |
| Chronic obstructive pulmonary disease                              | 0.690             | 0.508               | 0.182      |
| Dengue                                                             | 0.428             | 0.245               | 0.183      |
| Glaucoma                                                           | 0.640             | 0.451               | 0.189      |
| Diabetes mellitus                                                  | 0.593             | 0.394               | 0.199      |
| Rubella                                                            | 0.366             | 0.162               | 0.204      |
| Falls                                                              | 0.613             | 0.409               | 0.204      |
| Gonococcal infection                                               | 0.345             | 0.139               | 0.206      |
| Cholera                                                            | 0.324             | 0.106               | 0.218      |
| Leprosy                                                            | 0.815             | 0.597               | 0.218      |
| Collective violence and legal intervention                         | 0.613             | 0.835               | -0.222     |
| Peptic ulcer disease                                               | 0.375             | 0.151               | 0.224      |
| Typhoid and paratyphoid fevers                                     | 0.347             | 0.106               | 0.241      |
| Sexually transmitted chlamydial diseases                           | 0.413             | 0.172               | 0.241      |
| Maternal sepsis                                                    | 0.825             | 0.579               | 0.246      |
| Malaria                                                            | 0.471             | 0.224               | 0.247      |
| Lymphatic filariasis                                               | 0.564             | 0.316               | 0.248      |
| Abortion                                                           | 0.455             | 0.207               | 0.248      |
| Trachoma                                                           | 0.431             | 0.179               | 0.252      |
| Shigellosis                                                        | 0.372             | 0.106               | 0.266      |
| Syphilis                                                           | 0.519             | 0.247               | 0.272      |
| Leishmaniasis                                                      | 0.411             | 0.126               | 0.285      |
| Herpes genitalia                                                   | 0.442             | 0.151               | 0.291      |
| Benign neoplasm of brain and other parts of central nervous system | 0.571             | 0.865               | -0.294     |
| Thyroid cancer                                                     | 0.466             | 0.771               | -0.305     |
| Self-harm                                                          | 0.614             | 0.299               | 0.315      |
| Neonatal encephalopathy (birth asphyxia and birth trauma)          | 0.911             | 0.590               | 0.321      |
| Epilepsy                                                           | 0.778             | 0.432               | 0.346      |
| Chagas disease                                                     | 0.647             | 0.276               | 0.371      |
| Edentulism                                                         | 0.651             | 0.267               | 0.384      |
